# Supplementary material for: Gastrointestinal Mast Cell Tumor in an African Dormouse (Graphiurus sp.)
Source: MDPI journal article supplement (doi:10.3390/vetsci9090497), 2022-09-11
Supplement: s1 [file s1]

# Supplementary Figure & Legends

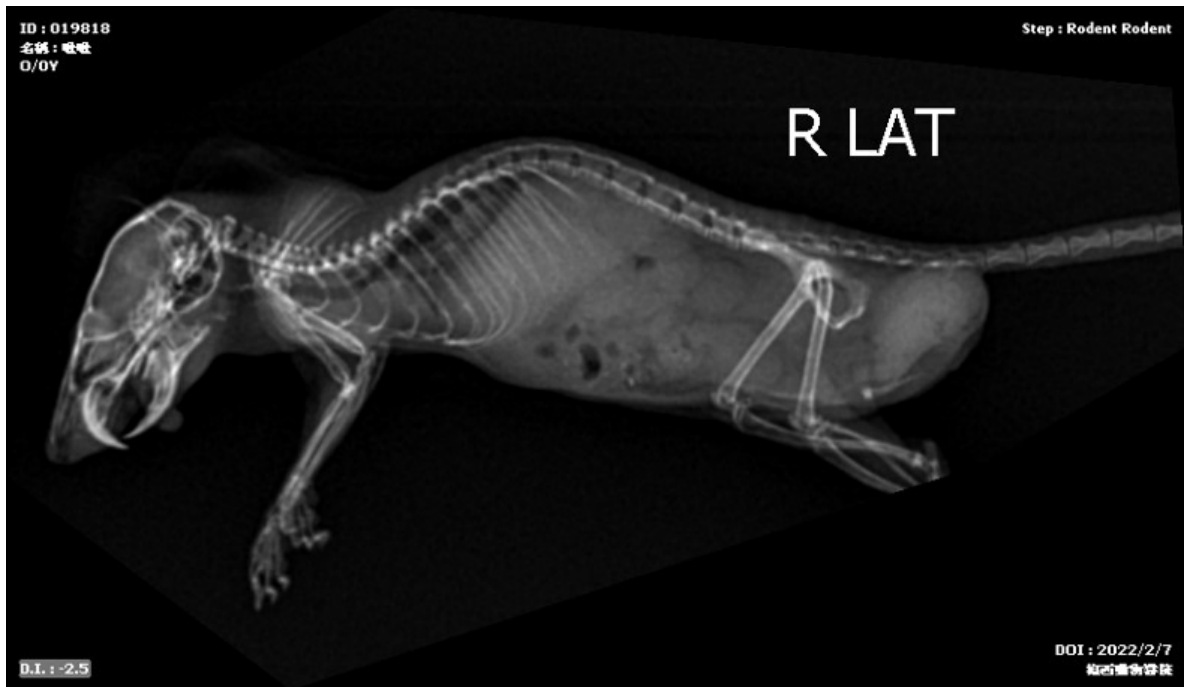

Supplementary Figure S1. Full radiography of the African dormouse. Note the increased opacity of the lungs and distension of intestines.
